# Supplementary material
Source: PubMed Central journal article supplement (PMC8832308)
Supplement: jama-e220948-s001.pdf [file jama-e220948-s001.pdf]

## Supplementary Online Content

Kam W, Holmes DN, Hernandez AF, et al. Association of recent use of non-vitamin K antagonist oral anticoagulants with intracranial hemorrhage among patients with acute ischemic stroke treated with alteplase. *JAMA*. Published online February 10, 2022. doi:10.1001/jama.2022.0948

**eFigure.** Study Population in the ARAMIS Registry

**eMethods.** Propensity Score Overlap Weighting

**eTable 1.** Brain Imaging Results

**eTable 2.** Associations between NOAC Treatment and Post-Thrombolytic Outcomes by Receipt of Endovascular Therapy (interaction *P* values)

**eTable 3.** Baseline Patient and Hospital Characteristics of Patients Taking NOACs and Treated with Alteplase by ARAMIS and GWTG-Stroke Registries

**eTable 4.** Baseline Patient and Hospital Characteristics of Patients Taking NOACs Who Are Eligible for Intravenous Alteplase, Stratified by Treatment Status

This supplementary material has been provided by the authors to give readers additional information about their work.

**eFigure. Study Population in the ARAMIS Registry**

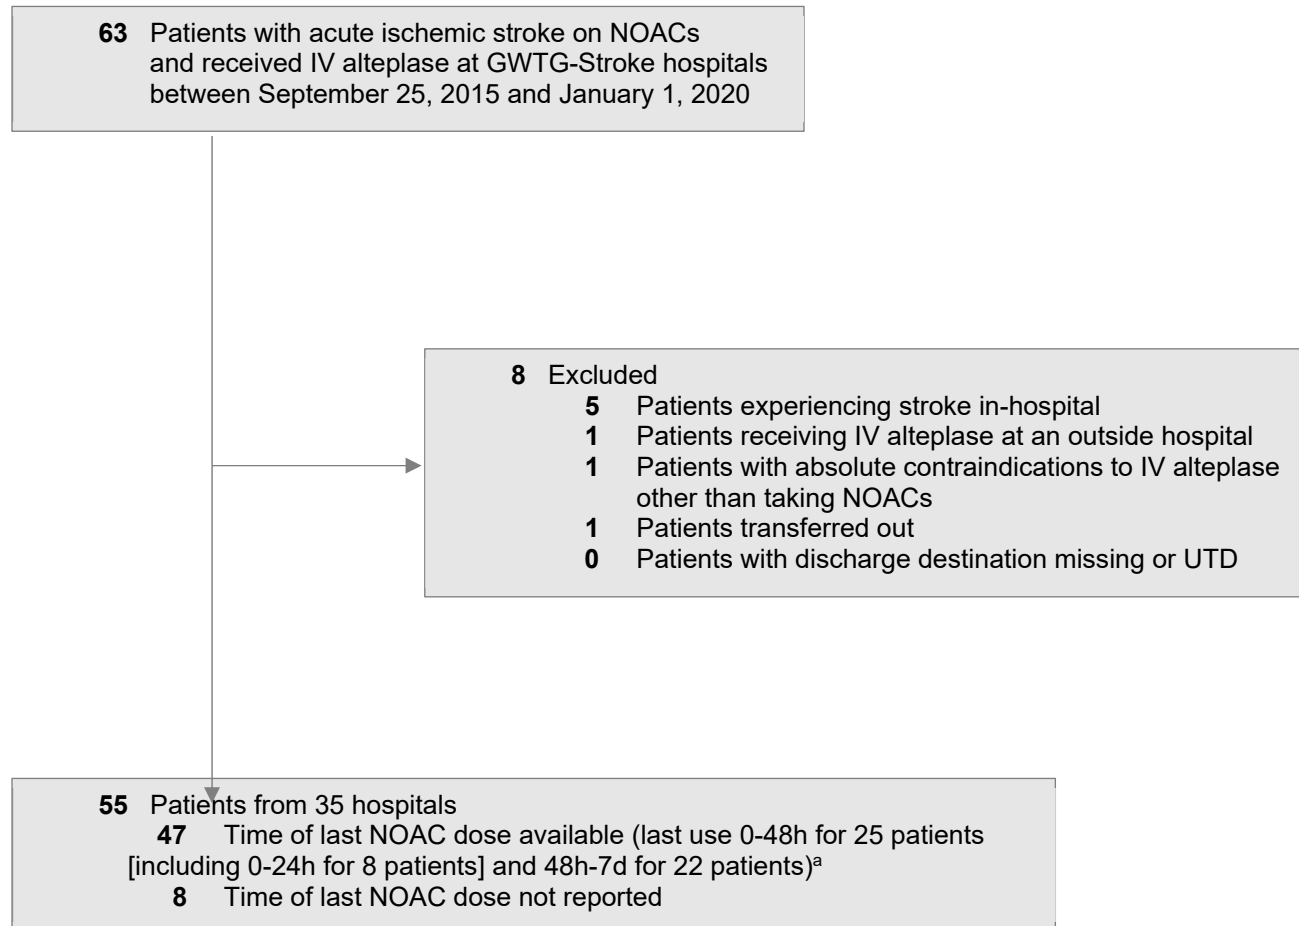

Abbreviations: ARAMIS, Addressing Real-world Anticoagulant Management Issues in Stroke; GWTG-Stroke, Get With The Guidelines-Stroke; IV, intravenous; NOAC, non-vitamin K antagonist oral anticoagulant; UTD, unable to determine.

<sup>a</sup> The reported date and time that the patient last took their anticoagulant medication was used to generate the time epochs; however, if the exact date and time was not available, the response to the question “Did patient stop anticoagulant medication >2 days prior to stroke onset?” was alternatively used to define the <48 hours and >48 hours time epochs.

## **eMethods.** Propensity Score Overlap Weighting

The study used overlap weighting that has been previously described in JAMA Guide to Statistics and Methods: Overlap Weighting: A Propensity Score Method That Mimics Attributes of a Randomized Clinical Trial.

“Overlap weighting assigns weights to each patient that are proportional to the probability of that patient belonging to the opposite treatment group. Specifically, treated patients are weighted by the probability of not receiving treatment ( $1 - \text{propensity score}$ ) and untreated patients are weighted by the probability of receiving the treatment (propensity score). These weights are smaller for extreme PS values so that outliers who are nearly always treated (PS near 1) or never treated (PS near 0) do not dominate results. These outliers contribute relatively less to the result, while patients whose characteristics are compatible with either treatment contribute relatively more. Overlap weighting leads to exact balance on the mean of every measured covariate when the PS is estimated by a logistic regression” (Thomas et al. 2020).

Li F, Morgan KL, Zaslavsky AM. Balancing covariates via propensity score weighting. *J Am Stat Assoc.* 2018;113(521):390-400. doi:10.1080/01621459.2016.1260466

Thomas LE, Li F, Pencina MJ. Overlap Weighting: A Propensity Score Method That Mimics Attributes of a Randomized Clinical Trial. *JAMA.* 2020;323(23):2417-2418. doi:10.1001/jama.2020.7819

**eTable 1. Brain Imaging Results**

|                                                                                                                                                                       | <b>Taking NOACs<br/>(n=2207)</b> | <b>Not taking AC<br/>(n=160831)</b> | <b>P Value</b> |
|-----------------------------------------------------------------------------------------------------------------------------------------------------------------------|----------------------------------|-------------------------------------|----------------|
| Positive finding on brain imaging of parenchymal hematoma, SAH, and or IVH following IV alteplase among hospitals reporting comprehensive stroke center data elements | 90 (4.1%)                        | 5699 (3.5%)                         | .68            |
| Results of positive brain image                                                                                                                                       |                                  |                                     |                |
| PH2                                                                                                                                                                   | 15 (0.7%)                        | 1060 (0.7%)                         | .80            |
| IVH                                                                                                                                                                   | 12 (0.5%)                        | 740 (0.5%)                          | .80            |
| SAH                                                                                                                                                                   | 27 (1.2%)                        | 1532 (1.0%)                         | .43            |
| RIH                                                                                                                                                                   | 5 (0.2%)                         | 291 (0.2%)                          | .77            |
| Not documented                                                                                                                                                        | 21 (1.0%)                        | 1224 (0.8%)                         | .56            |
| Other positive finding not listed above                                                                                                                               | 36 (1.6%)                        | 2271 (1.4%)                         | .78            |

Abbreviations: AC, anticoagulant; IV, intravenous; IVH, intraventricular hemorrhage; NOAC, non-vitamin K antagonist oral anticoagulant; PH2, parenchymal hematoma type 2; RIH, remote site of intraparenchymal hemorrhage outside the area of infarction; SAH, subarachnoid hemorrhage.

**eTable 2.** Associations between NOAC Treatment and Post-Thrombolytic Outcomes by Receipt of Endovascular Therapy (interaction *P* values)

| <b>Outcome</b>                                     | <b><i>P</i> Value</b> |
|----------------------------------------------------|-----------------------|
| Symptomatic intracranial hemorrhage <36 h          | .29                   |
| Life-threatening/serious systemic hemorrhage <36 h | .13                   |
| Any alteplase complication <sup>a</sup>            | .11                   |
| In-hospital mortality                              | .95                   |
| In-hospital mortality or discharge to hospice      | .79                   |
| Independent ambulation at discharge                | .85                   |
| Discharge mRS 0-2                                  | .45                   |
| Discharge mRS 0-1                                  | .94                   |
| Discharge to home                                  | .12                   |
| Discharge to hospice                               | .54                   |
| Discharge to inpatient rehabilitation facility     | .24                   |
| Discharge to skilled nursing facility              | .39                   |
| Length of stay (>4 days)                           | .58                   |

Abbreviations: mRS, modified Rankin Scale; NOAC, non-vitamin K antagonist oral anticoagulant.

<sup>a</sup> Any alteplase complication includes symptomatic intracranial hemorrhage <36 h, life-threatening/serious systemic hemorrhage <36 h, or other serious complications (those that require additional medical interventions or prolonged length of stay).

**eTable 3.** Baseline Patient and Hospital Characteristics of Patients Taking NOACs and Treated with Alteplase by ARAMIS and GWTG-Stroke Registries

|                                       | ARAMIS NOAC<br>(n=55) | GWTG NOAC<br>(n=2152) | Absolute<br>standardized<br>difference <sup>a</sup> |
|---------------------------------------|-----------------------|-----------------------|-----------------------------------------------------|
| Demographics                          |                       |                       |                                                     |
| Age, median (IQR), y                  | 74 (66-81)            | 75 (64-82)            | 6.7                                                 |
| Sex, n (%)                            |                       |                       | 5.4                                                 |
| Male                                  | 31 (56.4)             | 1155 (53.7)           |                                                     |
| Female                                | 24 (43.6)             | 997 (46.3)            |                                                     |
| Race and ethnicity, n (%)             |                       |                       |                                                     |
| Asian                                 | 3 (5.5)               | 73 (3.4)              | 10.0                                                |
| Hispanic                              | 4 (7.3)               | 192 (8.9)             | 6.1                                                 |
| Non-Hispanic Black                    | 8 (14.5)              | 334 (15.5)            | 2.7                                                 |
| Non-Hispanic White                    | 37 (67.3)             | 1451 (67.4)           | 0.3                                                 |
| Other <sup>b</sup>                    | 3 (5.5)               | 102 (4.7)             | 3.3                                                 |
| Health insurance status, n (%)        |                       |                       |                                                     |
| Medicare                              | 22/52 (42.3)          | 1060/2048 (51.8)      | 19.0                                                |
| Private                               | 26/52 (50.0)          | 719/2048 (35.1)       | 30.5                                                |
| Medicaid                              | 4/52 (7.7)            | 218/2048 (10.6)       | 10.2                                                |
| Self pay/no insurance                 | 0/52 (0.0)            | 43/2048 (2.1)         | 20.7                                                |
| Not documented                        | 0/52 (0.0)            | 8/2048 (0.4)          | 8.9                                                 |
| Year of stroke admission, n (%)       |                       |                       |                                                     |
| 2015                                  | 1 (1.8)               | 200 (9.3)             | 33.1                                                |
| 2016                                  | 10 (18.2)             | 330 (15.3)            | 7.6                                                 |
| 2017                                  | 11 (20.0)             | 408 (19.0)            | 2.6                                                 |
| 2018                                  | 16 (29.1)             | 531 (24.7)            | 10.0                                                |
| 2019                                  | 17 (30.9)             | 600 (27.9)            | 6.7                                                 |
| 2020                                  | 0 (0.0)               | 83 (3.9)              | 28.3                                                |
| Medical history, n (%)                |                       |                       |                                                     |
| Atrial fibrillation/flutter           | 44 (80.0)             | 1570 (73.0)           | 16.7                                                |
| CAD/prior MI                          | 18 (32.7)             | 606 (28.2)            | 9.9                                                 |
| Heart failure                         | 12 (21.8)             | 409 (19.0)            | 7.0                                                 |
| Prior stroke                          | 15 (27.3)             | 613 (28.5)            | 2.7                                                 |
| Prior TIA                             | 6 (10.9)              | 208 (9.7)             | 4.1                                                 |
| Prosthetic heart valve                | 0 (0.0)               | 21 (1.0)              | 14.0                                                |
| Carotid stenosis                      | 2 (3.6)               | 56 (2.6)              | 6.0                                                 |
| Diabetes mellitus                     | 22 (40.0)             | 697 (32.4)            | 15.9                                                |
| Peripheral vascular disease           | 1 (1.8)               | 74 (3.4)              | 10.1                                                |
| Hypertension                          | 46 (83.6)             | 1707 (79.3)           | 11.1                                                |
| Smoker                                | 4 (7.3)               | 238 (11.1)            | 13.2                                                |
| Dyslipidemia                          | 32 (58.2)             | 1067 (49.6)           | 17.3                                                |
| Chronic kidney disease                | 6 (10.9)              | 163 (7.6)             | 11.5                                                |
| Medications prior to admission, n (%) |                       |                       |                                                     |
| Any antiplatelets                     | 18 (32.7)             | 751 (34.9)            | 4.6                                                 |
| Single antiplatelet                   | 18 (32.7)             | 689 (32.0)            | 1.5                                                 |
| Aspirin                               | 16 (29.1)             | 675 (31.4)            | 5.0                                                 |
| Clopidogrel                           | 1 (1.8)               | 131 (6.1)             | 22.0                                                |
| Ticagrelor                            | 1 (1.8)               | 1 (0.0)               | 18.5                                                |
| Prasugrel                             | 0 (0.0)               | 3 (0.1)               | 5.3                                                 |
| Aspirin/dipyridamole                  | 0 (0.0)               | 1 (0.0)               | 3.1                                                 |

|                                                        | <b>ARAMIS NOAC<br/>(n=55)</b> | <b>GWTG NOAC<br/>(n=2152)</b> | <b>Absolute<br/>standardized<br/>difference<sup>a</sup></b> |
|--------------------------------------------------------|-------------------------------|-------------------------------|-------------------------------------------------------------|
| Dual antiplatelet                                      | 0 (0.0)                       | 61 (2.8)                      | 24.2                                                        |
| Antihypertensives                                      | 42 (76.4)                     | 1518 (70.5)                   | 13.2                                                        |
| Cholesterol-reducers                                   | 31 (56.4)                     | 1331 (61.8)                   | 11.2                                                        |
| Diabetic medications                                   | 10 (18.2)                     | 461 (21.4)                    | 8.1                                                         |
| <b>Patient information</b>                             |                               |                               |                                                             |
| NIHSS, median (IQR)                                    | 9 (5-15)                      | 10 (5-17)                     | 13.3                                                        |
| <b>Ambulatory status prior to admission, n (%)</b>     |                               |                               |                                                             |
| Able to ambulate independently                         | 44/45 (97.8)                  | 1446/1553 (93.1)              | 22.5                                                        |
| With assistance from person                            | 1/45 (2.2)                    | 65/1553 (4.2)                 | 11.2                                                        |
| Unable to ambulate                                     | 0/45 (0.0)                    | 42/1553 (2.7)                 | 23.6                                                        |
| <b>Ambulatory status at admission, n (%)</b>           |                               |                               |                                                             |
| Able to ambulate independently                         | 12/37 (32.4)                  | 324/1207 (26.8)               | 12.3                                                        |
| With assistance from person                            | 9/37 (24.3)                   | 326/1207 (27.0)               | 6.2                                                         |
| Unable to ambulate                                     | 16/37 (43.2)                  | 557/1207 (46.1)               | 5.8                                                         |
| Arrival by EMS, n (%)                                  | 38 (69.1)                     | 1708 (79.4)                   | 23.7                                                        |
| Arrival during off-hours, n (%)                        | 37 (67.3)                     | 1148 (53.3)                   | 28.8                                                        |
| BMI, median (IQR), kg/m <sup>2</sup>                   | 27.0 (24.6-33.8)              | 28.1 (24.3-33.2)              | 7.8                                                         |
| SBP, median (IQR), mm Hg                               | 152 (142-168)                 | 154 (136-173)                 | 3.6                                                         |
| DBP, median (IQR), mm Hg                               | 91 (75-97)                    | 87 (75-100)                   | 6.5                                                         |
| Heart rate, median (IQR), beats/min                    | 79 (70-98)                    | 82 (70-96)                    | 2.3                                                         |
| Blood glucose, median (IQR), mg/dL                     | 124 (106-153)                 | 122 (103-153)                 | 9.9                                                         |
| INR, median (IQR)                                      | 1.1 (1.0-1.2)                 | 1.1 (1.0-1.2)                 | 29.1                                                        |
| Serum creatinine, median (IQR), mg/dL                  | 1.1 (0.9-1.3)                 | 1.0 (0.8-1.3)                 | 0.2                                                         |
| <b>Treatment characteristics</b>                       |                               |                               |                                                             |
| Onset-to-needle time, median (IQR), min                | 143 (90-181)                  | 121 (89-167)                  | 18.1                                                        |
| Door-to-needle time, median (IQR), min                 | 55 (34-80)                    | 51 (37-69)                    | 1.9                                                         |
| Onset-to-arrival time, median (IQR), min               | 80.5 (45.0-116.0)             | 62.0 (40.0-101.0)             | 21.0                                                        |
| Received EVT, n (%)                                    | 12 (21.8%)                    | 403 (18.7%)                   | 7.7                                                         |
| Presence of large vessel occlusion, n (%) <sup>c</sup> | 16/38 (42.1%)                 | 516/1176<br>(43.9%)           | 3.6                                                         |
| <b>Site of occlusion, n (%)<sup>c</sup></b>            |                               |                               |                                                             |
| Middle cerebral artery                                 | 13/16 (81.3)                  | 429/516 (83.1)                | 4.9                                                         |
| Internal carotid artery                                | 2/16 (12.5)                   | 67/516 (13.0)                 | 1.5                                                         |
| Other cerebral artery branch                           | 2/16 (12.5)                   | 39/516 (7.6)                  | 16.5                                                        |
| Basilar artery                                         | 0/16 (0.0)                    | 16/516 (3.1)                  | 25.3                                                        |
| Vertebral artery                                       | 0/16 (0.0)                    | 9/516 (1.7)                   | 18.8                                                        |
| <b>Hospital characteristics</b>                        |                               |                               |                                                             |
| Number of beds, median (IQR)                           | 513 (381-650)                 | 409 (276-620)                 | 10.5                                                        |
| Annual ischemic stroke volume, median (IQR)            | 558 (287-704)                 | 368 (232-558)                 | 41.4                                                        |
| Annual IV thrombolytic cases, median (IQR)             | 66 (39-85)                    | 51 (29-81)                    | 26.5                                                        |
| Academic hospital, n (%)                               | 49 (89.1)                     | 1614 (75.0)                   | 37.4                                                        |
| <b>Stroke center status, n (%)</b>                     |                               |                               |                                                             |
| Comprehensive Stroke Center (CSC)                      | 27 (49.1)                     | 251 (11.7)                    | 89.1                                                        |
| Primary Stroke Center (PSC)                            | 19 (34.5)                     | 1143 (53.1)                   | 38.1                                                        |
| Neither CSC or PSC                                     | 9 (16.4)                      | 758 (35.2)                    | 44.2                                                        |
| <b>Geographic region, n (%)</b>                        |                               |                               |                                                             |
| South                                                  | 17 (30.9)                     | 993 (46.1)                    | 31.7                                                        |
| West                                                   | 19 (34.5)                     | 484 (22.5)                    | 26.9                                                        |
| Northeast                                              | 7 (12.7)                      | 366 (17.0)                    | 12.1                                                        |
| Midwest                                                | 12 (21.8)                     | 309 (14.4)                    | 19.5                                                        |

|                       | <b>ARAMIS NOAC<br/>(n=55)</b> | <b>GWTG NOAC<br/>(n=2152)</b> | <b>Absolute<br/>standardized<br/>difference<sup>a</sup></b> |
|-----------------------|-------------------------------|-------------------------------|-------------------------------------------------------------|
| Rural location, n (%) | 0 (0.0)                       | 41 (1.9)                      | 19.7                                                        |

Abbreviations: AC, anticoagulant; ARAMIS, Addressing Real-world Anticoagulant Management Issues in Stroke; BMI, body mass index; CAD, coronary artery disease; DBP, diastolic blood pressure; EMS, Emergency Medical Services; EVT, endovascular therapy; GWTG-Stroke, Get With The Guidelines-Stroke; INR, international normalized ratio; IQR, interquartile range; IV, intravenous; MI, myocardial infarction; NIHSS, National Institutes of Health Stroke Scale; NOAC, non-vitamin K antagonist oral anticoagulant; SBP, systolic blood pressure; TIA, transient ischemic attack.

<sup>a</sup> The absolute standardized difference is calculated as the difference in means or proportions divided by a pooled estimate of the standard deviation and multiplied by 100.

<sup>b</sup> Other includes American Indian/Alaska Native, Native Hawaiian or Pacific Islander, multiracial, or any other non-Black or non-White race categories.

<sup>c</sup> Not available in the GWTG-Stroke registry until 2019.



**eTable 4.** Baseline Patient and Hospital Characteristics of Patients Taking NOACs Who Are Eligible for Intravenous Alteplase, Stratified by Treatment Status

|                                              | NOAC rt-PA<br>(n=2207) | NOAC no rt-PA<br>(n=22977) | Absolute<br>standardized<br>difference <sup>a</sup> |
|----------------------------------------------|------------------------|----------------------------|-----------------------------------------------------|
| <b>Demographics</b>                          |                        |                            |                                                     |
| Age, median (IQR), y                         | 75 (64-82)             | 77 (68-85)                 | 19.8                                                |
| Sex, n (%)                                   |                        |                            |                                                     |
| Male                                         | 1186 (53.7)            | 11509 (50.1)               | 7.3                                                 |
| Female                                       | 1021 (46.3)            | 11468 (49.9)               |                                                     |
| Race and ethnicity, n (%)                    |                        |                            |                                                     |
| Asian                                        | 76/2207 (3.4)          | 581/22973 (2.5)            | 5.4                                                 |
| Hispanic                                     | 196/2207 (8.9)         | 1367/22973 (6.0)           | 11.2                                                |
| Non-Hispanic Black                           | 342/2207<br>(15.5)     | 2924/22973<br>(12.7)       | 8.0                                                 |
| Non-Hispanic White                           | 1488/2207<br>(67.4)    | 17275/22973<br>(75.2)      | 17.3                                                |
| Other <sup>b</sup>                           | 105/2207 (4.8)         | 826/22973 (3.6)            | 5.8                                                 |
| <b>Health insurance status, n (%)</b>        |                        |                            |                                                     |
| Medicare                                     | 1082/2100<br>(51.5)    | 11763/22258<br>(52.8)      | 2.7                                                 |
| Private                                      | 745/2100<br>(35.5)     | 8433/22258<br>(37.9)       | 5.0                                                 |
| Medicaid                                     | 222/2100<br>(10.6)     | 1719/22258 (7.7)           | 9.9                                                 |
| Self pay/no insurance                        | 43/2100 (2.0)          | 287/22258 (1.3)            | 5.9                                                 |
| Not documented                               | 8/2100 (0.4)           | 56/22258 (0.3)             | 2.3                                                 |
| <b>Year of stroke admission, n (%)</b>       |                        |                            |                                                     |
| 2015                                         | 201 (9.1)              | 1990 (8.7)                 | 1.6                                                 |
| 2016                                         | 340 (15.4)             | 3194 (13.9)                | 4.3                                                 |
| 2017                                         | 419 (19.0)             | 4314 (18.8)                | 0.5                                                 |
| 2018                                         | 547 (24.8)             | 5527 (24.1)                | 1.7                                                 |
| 2019                                         | 617 (28.0)             | 6956 (30.3)                | 5.1                                                 |
| 2020                                         | 83 (3.8)               | 996 (4.3)                  | 2.9                                                 |
| <b>Medical history, n (%)</b>                |                        |                            |                                                     |
| Atrial fibrillation/flutter                  | 1614 (73.1)            | 17110 (74.5)               | 3.0                                                 |
| CAD/prior MI                                 | 624 (28.3)             | 7393 (32.2)                | 8.5                                                 |
| Heart failure                                | 421 (19.1)             | 4639 (20.2)                | 2.8                                                 |
| Prior stroke                                 | 628 (28.5)             | 8837 (38.5)                | 21.3                                                |
| Prior TIA                                    | 214 (9.7)              | 3236 (14.1)                | 13.6                                                |
| Prosthetic heart valve                       | 21 (1.0)               | 446 (1.9)                  | 8.3                                                 |
| Carotid stenosis                             | 58 (2.6)               | 997 (4.3)                  | 9.3                                                 |
| Diabetes mellitus                            | 719 (32.6)             | 7654 (33.3)                | 1.6                                                 |
| Peripheral vascular disease                  | 75 (3.4)               | 1520 (6.6)                 | 14.8                                                |
| Hypertension                                 | 1753 (79.4)            | 18631 (81.1)               | 4.2                                                 |
| Smoker                                       | 242 (11.0)             | 2181 (9.5)                 | 4.9                                                 |
| Dyslipidemia                                 | 1099 (49.8)            | 12626 (55.0)               | 10.3                                                |
| Chronic kidney disease                       | 169 (7.7)              | 2556 (11.1)                | 11.9                                                |
| <b>Medications prior to admission, n (%)</b> |                        |                            |                                                     |
| Any antiplatelets                            | 769 (34.8)             | 7200 (31.3)                | 7.5                                                 |
| Single antiplatelet                          | 707 (32.0)             | 6723 (29.3)                | 6.0                                                 |

|                                                        | <b>NOAC rt-PA<br/>(n=2207)</b> | <b>NOAC no rt-PA<br/>(n=22977)</b> | <b>Absolute<br/>standardized<br/>difference<sup>a</sup></b> |
|--------------------------------------------------------|--------------------------------|------------------------------------|-------------------------------------------------------------|
| Aspirin                                                | 691 (31.3)                     | 6344 (27.6)                        | 8.1                                                         |
| Clopidogrel                                            | 132 (6.0)                      | 1214 (5.3)                         | 3.0                                                         |
| Ticagrelor                                             | 2 (0.1)                        | 40 (0.2)                           | 2.3                                                         |
| Prasugrel                                              | 3 (0.1)                        | 4 (0.0)                            | 4.3                                                         |
| Aspirin/dipyridamole                                   | 1 (0.0)                        | 27 (0.1)                           | 2.5                                                         |
| Dual antiplatelet                                      | 61 (2.8)                       | 462 (2.0)                          | 4.9                                                         |
| Antihypertensives                                      | 1560 (70.7)                    | 16424 (71.5)                       | 1.8                                                         |
| Cholesterol-reducers                                   | 1362 (61.7)                    | 14171 (61.7)                       | 0.1                                                         |
| Diabetic medications                                   | 471 (21.3)                     | 5089 (22.1)                        | 2.0                                                         |
| <b>Patient information</b>                             |                                |                                    |                                                             |
| NIHSS, median (IQR)                                    | 10 (5-17)                      | 5 (2-13)                           | 43.3                                                        |
| <b>Ambulatory status prior to admission, n (%)</b>     |                                |                                    |                                                             |
| Able to ambulate independently                         | 1490/1598<br>(93.2)            | 14575/16540<br>(88.1)              | 17.7                                                        |
| With assistance from person                            | 66/1598 (4.1)                  | 1272/16540 (7.7)                   | 15.1                                                        |
| Unable to ambulate                                     | 42/1598 (2.6)                  | 693/16540 (4.2)                    | 8.6                                                         |
| <b>Ambulatory status at admission, n (%)</b>           |                                |                                    |                                                             |
| Able to ambulate independently                         | 336/1244<br>(27.0)             | 4604/12645<br>(36.4)               | 20.3                                                        |
| With assistance from person                            | 335/1244<br>(26.9)             | 3798/12645<br>(30.0)               | 6.9                                                         |
| Unable to ambulate                                     | 573/1244<br>(46.1)             | 4243/12645<br>(33.6)               | 25.8                                                        |
| Arrival by EMS, n (%)                                  | 1746 (79.1)                    | 15942 (69.4)                       | 22.4                                                        |
| Arrival during off-hours, n (%)                        | 1185 (53.7)                    | 12511 (54.5)                       | 1.5                                                         |
| BMI, median (IQR), kg/m <sup>2</sup>                   | 28.1 (24.3-<br>33.3)           | 27.7 (24.1-32.3)                   | 11.0                                                        |
| SBP, median (IQR), mm Hg                               | 154 (136-173)                  | 151 (133-171)                      | 9.6                                                         |
| DBP, median (IQR), mm Hg                               | 88 (75-100)                    | 83 (72-95)                         | 20.9                                                        |
| Heart rate, median (IQR), beats/min                    | 82 (70-96)                     | 80 (69-93)                         | 10.3                                                        |
| Blood glucose, median (IQR), mg/dL                     | 122 (103-153)                  | 121 (103-154)                      | 0.3                                                         |
| INR, median (IQR)                                      | 1.1 (1.0-1.2)                  | 1.2 (1.1-1.3)                      | 60.5                                                        |
| Serum creatinine, median (IQR), mg/dL                  | 1.0 (0.8-1.3)                  | 1.0 (0.8-1.3)                      | 0.8                                                         |
| <b>Treatment characteristics</b>                       |                                |                                    |                                                             |
| Onset-to-needle time, median (IQR), min                | 122 (89-168)                   |                                    | .                                                           |
| Door-to-needle time, median (IQR), min                 | 51 (37-69)                     |                                    | .                                                           |
| Onset-to-arrival time, median (IQR), min               | 62 (40-102)                    | 78 (47-132)                        | 31.0                                                        |
| Received EVT, n (%)                                    | 415 (18.8)                     | 2910 (12.7)                        | 16.9                                                        |
| Presence of large vessel occlusion, n (%) <sup>c</sup> | 532/1214<br>(43.8)             | 4120/12271<br>(33.6)               | 21.2                                                        |
| <b>Site of occlusion, n (%)<sup>c</sup></b>            |                                |                                    |                                                             |
| Middle cerebral artery                                 | 442/532 (83.1)                 | 3125/4113 (76.0)                   | 17.7                                                        |
| Internal carotid artery                                | 69/532 (13.0)                  | 737/4113 (17.9)                    | 13.7                                                        |
| Other cerebral artery branch                           | 41/532 (7.7)                   | 391/4113 (9.5)                     | 6.4                                                         |
| Basilar artery                                         | 16/532 (3.0)                   | 140/4113 (3.4)                     | 2.3                                                         |
| Vertebral artery                                       | 9/532 (1.7)                    | 126/4113 (3.1)                     | 9.0                                                         |
| <b>Hospital characteristics</b>                        |                                |                                    |                                                             |
| Number of beds, median (IQR)                           | 411 (278-620)                  | 376 (244-585)                      | 10.3                                                        |
| Annual ischemic stroke volume, median (IQR)            | 368 (232-563)                  | 336 (203-545)                      | 7.4                                                         |
| Annual IV thrombolytic cases, median (IQR)             | 51 (30-82)                     | 40 (20-67)                         | 29.3                                                        |
| Academic hospital, n (%)                               | 1663 (75.4)                    | 16935 (73.7)                       | 3.8                                                         |

|                                   | <b>NOAC rt-PA<br/>(n=2207)</b> | <b>NOAC no rt-PA<br/>(n=22977)</b> | <b>Absolute<br/>standardized<br/>difference<sup>a</sup></b> |
|-----------------------------------|--------------------------------|------------------------------------|-------------------------------------------------------------|
| Stroke center status, n (%)       |                                |                                    |                                                             |
| Comprehensive Stroke Center (CSC) | 278 (12.6)                     | 2761 (12.0)                        | 1.8                                                         |
| Primary Stroke Center (PSC)       | 1162 (52.7)                    | 12099 (52.7)                       | 0.01                                                        |
| Neither CSC or PSC                | 767 (34.8)                     | 8117 (35.3)                        | 1.2                                                         |
| Geographic region, n (%)          |                                |                                    |                                                             |
| South                             | 1010 (45.8)                    | 9444 (41.1)                        | 9.4                                                         |
| West                              | 503 (22.8)                     | 4164 (18.1)                        | 11.6                                                        |
| Northeast                         | 373 (16.9)                     | 5383 (23.4)                        | 16.3                                                        |
| Midwest                           | 321 (14.5)                     | 3986 (17.3)                        | 7.7                                                         |
| Rural location, n (%)             | 41 (1.9)                       | 812 (3.5)                          | 10.4                                                        |

Abbreviations: AC, anticoagulant; BMI, body mass index; CAD, coronary artery disease; DBP, diastolic blood pressure; EMS, Emergency Medical Services; EVT, endovascular therapy; INR, international normalized ratio; IQR, interquartile range; IV, intravenous; MI, myocardial infarction; NIHSS, National Institutes of Health Stroke Scale; NOAC, non-vitamin K antagonist oral anticoagulant; rt-PA, recombinant tissue-type plasminogen activator; SBP, systolic blood pressure; TIA, transient ischemic attack.

<sup>a</sup> The absolute standardized difference is calculated as the difference in means or proportions divided by a pooled estimate of the standard deviation and multiplied by 100.

<sup>b</sup> Other includes American Indian/Alaska Native, Native Hawaiian or Pacific Islander, multiracial, or any other non-Black or non-White race categories.

<sup>c</sup> Not available in the GWTG-Stroke registry until 2019.
